# Combining high resolution and exact calibration to boost statistical power: A well-calibrated score function for high-resolution MS2 data

Andy Lin  
Department of Genome Sciences  
University of Washington

J. Jeffrey Howbert  
Department of Genome Sciences  
University of Washington

William Stafford Noble\*  
Department of Genome Sciences  
Department of Computer Science and Engineering  
University of Washington

March 28, 2018

## Abstract

To achieve accurate assignment of peptide sequences to observed fragmentation spectra, a shotgun proteomics database search tool must make good use of the very high resolution information produced by state-of-the-art mass spectrometers. However, making use of this information while also ensuring that the search engine’s scores are well calibrated—i.e., that the score assigned to one spectrum can be meaningfully compared to the score assigned to a different spectrum—has proven to be challenging. Here, we describe a database search score function, the “residue evidence” (res-ev) score, that achieves both of these goals simultaneously. We also demonstrate how to combine calibrated res-ev scores with calibrated XCorr scores to produce a “combined p-value” score function. We provide a benchmark consisting of four mass spectrometry data sets, which we use to compare the combined p-value to the score functions used by several existing search engines. Our results suggest that the combined p-value achieves state-of-the-art performance, generally outperforming MS Amanda and Morpheus and performing comparably to MS-GF+. The res-ev and combined p-value score functions are freely available as part of the Tide search engine in the Crux mass spectrometry toolkit (<http://crux.ms>).

**Keywords:** database search, statistical calibration, high-resolution MS2

## 1 Introduction

In the analysis of protein tandem mass spectrometry data produced in a bottom-up fashion using traditional, data-dependent acquisition, the database search step is critical. In this step, each observed spectrum is assigned to a peptide sequence drawn from a given database, and the resulting peptide-spectrum match (PSM) is assigned a score. Ideally, a “good” score implies that the peptide was likely to have been responsible for generating the observed spectrum. Of course, in the context of a typical scientific study, the end goal is usually downstream of the PSMs—e.g., to detect and quantify proteins, or to characterize proteins whose quantification changes across experimental conditions. However, none of these downstream steps can be accomplished if the database search step fails. Furthermore, although in principle *de novo* approaches can help to identify some observed spectra, in practice *de novo* approaches do not approach the power of database search strategies to detect hundreds or thousands of peptides in a given complex mixture (1). Consequently, a database search engine forms the backbone of most shotgun proteomics analysis pipelines.

\*Corresponding author: Box 355065, Foege Building, S220B, 3720 15th Ave NE, Seattle, WA 98195-5065, [william-noble@uw.edu](mailto:william-noble@uw.edu)

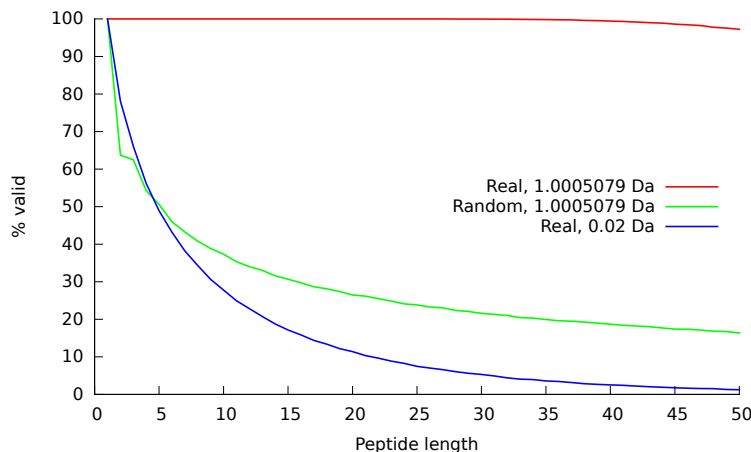

Figure 1: The figure plots, as a function of peptide length, the proportion of randomly generated peptide sequences that obey Equation 1. The two series marked “Real” use monoisotopic masses from the 20 real amino acids; the series marked “Random” uses masses that have a random number in the range  $(0, 1]$  added to each mass. Two bin sizes (1.005079 Da and 0.02 Da) are used. For each series, a total of 100,000 peptides were simulated.

13 Given the importance of database search, it is not surprising that dozens of search engines have been  
14 developed since the advent of the first such search tool, SEQUEST, in 1994 (2) (reviewed by (3)). The  
15 algorithms employed by all of these engines are remarkably consistent. For each spectrum, the algorithm  
16 extracts from the given database all peptides whose masses fall within a user-specified tolerance of the  
17 inferred precursor mass associated with the observed spectrum. Each of these candidate peptides is then  
18 scored against the observed spectrum, and the top-scoring peptide is reported as a PSM. Thus, in practice,  
19 the defining characteristic of any search engines lies in the details of its peptide-to-spectrum score function.  
20 The history of development of shotgun proteomics search engines can be seen primarily as a history of  
21 development of PSM score functions.

22 Some new score functions are driven by technology. For example, over the past decade, the resolution at  
23 which tandem mass spectra can be efficiently collected has improved dramatically. Typical data sets offer  
24 fragment ion resolution in the range of 5–10 ppm, compared to the  $\sim 1$  Da resolution that was common  
25 a decade ago. This improved resolution means that score functions designed for low resolution data did  
26 not necessarily generalize well to higher resolutions. For example, the score function in Morpheus (4) was  
27 explicitly designed to make good use of high-resolution mass accuracy.

28 On the other hand, some new score functions are driven by conceptual advances. A notable trend was  
29 the introduction of score functions that aim to achieve good calibration (5–7). We say that a score function  
30 is *calibrated* if a score of  $x$  assigned to one spectrum has the same meaning or significance as a score of  
31  $x$  assigned to a different spectrum. In practice, many PSM score functions are not well calibrated with  
32 respect to spectra, that is, they tend to assign systematically different scores to different spectra. Therefore,  
33 performing database search with such a function yields a loss of statistical power (8). One way to improve  
34 the calibration of a given score function is to compute, for a given spectrum, the distribution of scores for  
35 all possible peptides. The cumulative density function of the resulting distribution then provides a well  
36 calibrated score, called a p-value. MS-GF+ demonstrated how to carry out this style of calibration using a  
37 dynamic programming procedure (5), and a similar approach was adopted subsequently by RAId.aPS (6)  
38 and Tide (7).

39 Unfortunately, a significant drawback to the dynamic programming calibration procedure is that it typi-  
40 cally breaks down when employed in conjunction with data generated using high-resolution fragment mass  
41 accuracy. To explain the problem, it is first necessary to outline how the dynamic programming algorithm  
42 works. Any dynamic programming procedure involves building up a table of solutions to problems of in-  
43 creasing size. In the case of the procedures employed by MS-GF+, RAId.aPS, and Tide, the entry in row  $i$   
44 and column  $j$  of the dynamic programming table contains a count of the total number of peptide sequences

45 whose (discretized) mass is  $i$  and whose (discretized) score with respect to the current spectrum is  $j$ . The  
46 procedure works by filling in values in this table for increasingly large values of  $i$  and  $j$ , computing each new  
47 value by summing over existing entries in the table (see Methods for details).

48 The problem arises in the discretization of the mass axis. The logic associated with filling in the table  
49 requires sequentially adding together discretized amino acid masses. For this sequential summation to work  
50 properly, it must be the case that, for any given peptide, the sum of the discretized amino acid masses equals  
51 the discretized sum of the amino acid masses. More concretely, using a bin size of  $w$  and for a peptide  
52 consisting of amino acids  $a_1, a_2, \dots, a_n$ , it must be the case that

$$\text{round}((a_1 + a_2 + \dots + a_n)/w) = \text{round}(a_1/w) + \text{round}(a_2/w) + \dots + \text{round}(a_n/w). \quad (1)$$

53 Whether and how frequently Equation 1 is violated depends upon properties of the amino acid masses  
54 and the size of the bins used to discretize the mass axis. It is easy to see that, for arbitrary amino acid masses  
55 and peptides of reasonable length, Equation 1 will frequently be violated (“Random” series in Figure 1). On  
56 the other hand, when we use real amino acid masses and a bin size of  $\sim 1$  Da, short peptides uniformly obey  
57 Equation 1. This is because peptide masses are naturally discrete. Longer peptides do occasionally break the  
58 rules because peptide masses are not perfectly discrete; however, for peptides of the size typically considered  
59 by shotgun proteomics, this rule-breaking is quite rare. The story changes, however, when we modify the  
60 bin size used to discretize the fragment  $m/z$  axis. Because such bins do not align well with the natural  
61 discreteness of the peptide mass axis, Equation 1 is violated quite frequently. Consequently, the dynamic  
62 programming procedure ends up spreading the counts associated with peptides of mass  $i$  among bins in rows  
63  $i - 1$ ,  $i$ , and  $i + 1$ . We are thus left with a conundrum: we have two techniques to achieve improved statistical  
64 power—using increased resolution on the fragment  $m/z$  axis or using dynamic programming to achieve good  
65 score calibration—but we cannot use both of these techniques simultaneously.

66 One solution to this problem is to modify the score function. MS-GF+ does this by creating a score  
67 function that takes into account both the intensity of each observed peak as well as its participation in a pair  
68 of peaks with a mass difference equal to the mass of an amino acid. The latter term, which is implemented  
69 as a weight associated with a given peak, can be computed in high resolution, even if the peaks themselves  
70 are scored in low resolution. The dynamic programming procedure can then be carried out in the usual  
71 fashion, simply by incorporating these weights.

72 In this work, we propose an alternative solution. We begin with the XCorr score function, which was  
73 included in the very first search engine, SEQUEST, and continues to be used in SEQUEST and a variety of  
74 other search engines, including Comet (9), Tide (10), and RAID\_aPS (6). However, rather than modifying the  
75 XCorr score function to take into account high-resolution mass information, we create a new score function,  
76 the “residue-evidence” (res-ev) score, that considers pairs of peaks, similar to the MS-GF+ approach. We  
77 then score each observed spectrum twice: once with the low-resolution XCorr score that focuses on individual  
78 peaks, and once with the high-resolution score that focuses on pairs of peaks. We use dynamic programming  
79 to convert each of these scores to p-values, and we employ a previously described method to estimate the  
80 p-value for the product of dependent p-values (11).

81 In this work, we demonstrate that the new res-ev score function provides improved performance on some  
82 high-resolution data sets, and that the res-ev and XCorr score functions are complementary to one another.  
83 Finally, we demonstrate that the combined XCorr+res-ev p-value yields state-of-the-art performance across  
84 a variety of data sets, outperforming MS Amanda and Morpheus and performing comparably to MS-GF+,  
85 despite having no trainable parameters. The combined p-value and res-ev p-value score functions are available  
86 in the Tide search engine, which is part of the Crux toolkit (<http://crux.ms>).

## 87 2 Methods

### 88 2.1 The XCorr score

89 The XCorr score function was first described in 1994 as part of the SEQUEST search engine (2) and is still  
90 in use today in the commercial SEQUEST product from Thermo Scientific as well as search engines such as  
91 Comet (9), Tide (10), X!Tandem (12) and RAID\_aPS (6).

92 In our implementation, the first part of the XCorr score involves preprocessing the observed spectrum in  
93 four steps, as follows:

- 94 1. The mass axis is discretized by creating a vector  $O$  of mass bins with bin width = 1.0005079 Da. Each  
95 bin  $O_i$  is assigned an intensity value, which is the maximum of the intensities of observed peaks whose  
96 masses fall within the mass range of  $O_i$ . The bin width is chosen to match the natural quasi-integer  
97 masses of peptides and peptide fragments, which in turn derive from the quasi-integer masses of the  
98 primary constituent elements of peptides (C, H, N, O, S).
- 99 2. The intensity of each bin  $O_i$  is replaced by its square root.
- 100 3. Peaks with intensity less than 5.0% of the maximum intensity peak are eliminated from the spectrum.
- 101 4.  $O$  is divided into 10 equal length segments, and the intensities within each segment are normalized so  
102 the maximum intensity in the segment is 50.
- 103 5. A scaled version of  $O$  is subtracted from itself at each position across a defined window of offsets:  
104 
$$\hat{O}_i = O_i - \frac{1}{151} \sum_{\tau=-75}^{75} O_{i-\tau}$$

105 Next, the preprocessed observed spectrum  $\hat{O}$  is converted to an “evidence vector”  $E$  with  $n$  discretized  
106 mass bins, where  $n$  is the integer mass of the spectrum precursor. Each bin  $E_i$  specifies the cumulative  
107 evidence for cleavage at some hypothetical position on the backbone of the precursor peptide. More precisely,  
108  $E_i$  holds the weighted sum of all intensities in  $\hat{O}$  whose mass is consistent with a cleavage producing a b ion  
109 with integer mass  $m_b = i$ :

$$E_i = \sum_{m \in I} w_m \cdot \hat{O}_m \quad (2)$$

110 where  $I$  are the integer masses of the b, y, and neutral loss ions consistent with  $m_b$  and  $n$ , and  $w_m = 1$   
111 for b- and y-ions and  $w_m = 0.2$  for neutral losses. We consider neutral losses of carbon monoxide (CO,  
112 also known as “a-ions”), ammonia (NH<sub>3</sub>) and water (H<sub>2</sub>O) groups. If the precursor charge assigned to the  
113 spectrum is  $> 2$ , then fragments with charge  $> 1$  are possible. In this case all peaks are replicated into  
114 lower-mass bins with the appropriate m/z. In particular, for a precursor of charge  $n$ , fragment ions up to  
115 charge  $n - 1$  are considered. In most implementations of XCorr, if two or more predicted peaks fall in the  
116 same mass bin, then the intensity in that bin is the maximum of those peaks’ intensities. However, in order  
117 to facilitate calibration via dynamic programming, we wish to make the XCorr score function fully additive.  
118 Consequently, Equation 2 uses the sum of the peak intensities rather than the maximum (7).

119 We then predict a very simple theoretical spectrum from the sequence of the peptide. For this step,  
120 we use a discrete mass vector  $B$ , again using a bin width of 1.0005079 Da. For each possible backbone  
121 fragmentation of the peptide,  $B$  is populated with a single binary marker at the mass of the corresponding  
122 b ion.

123 The final XCorr score is a simple dot product between the evidence vector  $E$  and the theoretical spectrum  
124  $B$ . Thus, the score is essentially the sum of the evidence for all the cleavage events across the length of the  
125 peptide.

## 126 2.2 The residue evidence score

127 The computation of the residue evidence score proceeds in the same steps outlined above for XCorr: pre-  
128 processing of the observed spectrum, aggregation of evidence, generation of a theoretical spectrum, and  
129 calculation of a score based on the evidence and the theoretical spectrum. Unlike the XCorr processing,  
130 which aggregates evidence into a vector indexed by m/z, the res-ev score aggregates evidence in a matrix  
131 indexed by m/z and amino acid.

132 The residue evidence score preprocessing employs a subset of the steps previously described for XCorr.

- 133 1. The intensity of each peak is replaced by its square root.
- 134 2. Peaks with intensity less than 5.0% of the maximum intensity peak are eliminated from the spectrum.  
135 Peaks within a 1.5 Th window of the precursor peak (assuming ‘remove-precursor-peak=T’) are also  
136 eliminated.
- 137 3. The spectrum is divided into 10 equal length segments, and the intensities within each segment is  
138 normalized so the maximum intensity in the segment is 50.

139 There are two important changes in this preprocessing compared to that for the XCorr score function. First,  
 140 discretization of the peaks' mass values is deferred until after the high-resolution residue evidence has been  
 141 quantified and aggregated. Second, the final subtractive step, which induces a cross-correlation penalty in the  
 142 XCorr score function, is omitted altogether. Another difference is the addition of two peaks, representing  
 143 the  $m/z$  of the N-terminal group and the  $m/z$  of the precursor minus the C-terminal group (typically a  
 144 hydroxyl group). Both of these peaks have intensities of zero.

145 Next, we quantify and aggregate evidence for each type of residue inducing a b-ion cleavage at each  
 146 possible  $m/z$  bin. The residue evidence is defined as follows. Let an arbitrary pair of MS2 peaks  $A$  and  $B$   
 147 have measured masses  $m_A$  and  $m_B$ , such that  $m_A > m_B$  and the difference in mass  $m_{diff} = m_A - m_B$ . We  
 148 say evidence *exists* for a (charge 1+) b ion fragment with mass  $m_A$ , terminating in amino acid residue  $X$ , if  
 149 the deviation  $\text{abs}(m_{diff} - m_X) < m_{tol}$ , where  $m_{tol}$  is the maximum deviation tolerated between  $m_{diff}$  and  
 150  $m_X$ . In practice,  $m_{tol}$  is on the order of the mass spectrometer's MS2 resolution. The *magnitude*  $r$  assigned  
 151 to this residue evidence is scaled so as to reward small deviations:

$$r = \max(0, 1 - \text{abs}(m_{diff} - m_X)/m_{tol}) \quad (3)$$

152 i.e.,  $r$  takes a value of 1 when the deviation is 0, and 0 when the deviation is equal to or greater than  $m_{tol}$ .  
 153 This magnitude  $r$  is then multiplied by the sum of the rank intensities of the two peaks, prior to being stored.

154 Residue evidence is stored in a two-dimensional *residue evidence matrix*  $R$ . The columns of  $R$  are indexed  
 155 by discretized masses  $m_j$ , and the rows of  $R$  correspond to the amino acids  $a_i$  found in the peptide database  
 156 (typically around 20 rows). The increment of evidence  $r$  generated according to Eq. 3 is added to element  
 157  $R_{a_i m_j}$ , where  $a_i = X$  and  $m_j$  is obtained by discretizing  $m_A$  with a bin width  $W = 1.0005079$  Da.

158 Each pair of peaks  $A$  and  $B$  is also considered as a putative pair of charge 1+ y ions, charge 2+ b  
 159 ions, and charge 2+ y ions, and additional residue evidence is generated using appropriate modifications  
 160 to Eq. 3. In all cases, however, the evidence is added to the element of  $R$  indexed by the discretized mass  
 161 of the corresponding charge 1+ b ion, so that all evidence related to a particular locus of fragmentation is  
 162 aggregated together.

163 Once all possible residue evidence has been accumulated into matrix  $R$ , the values in  $R$  undergo a linear  
 164 discretization to integer values, such that the minimum value in  $R$  is 0 and the maximum is some specified  
 165 integer  $r_{max}$ . This integer discretization ensures that scores will have integer values, which is required for  
 166 the subsequent dynamic programming.

167 The theoretical spectrum corresponding to a candidate peptide is very simple. For each possible prefix  
 168 sequence of the peptide a tuple is created, consisting of two elements: the identity of the prefix's C-terminal  
 169 amino acid and an integer formed by discretizing the prefix mass with bin width  $W = 1.0005079$ . For a can-  
 170 didate peptide  $P$  of length  $n$ , the full representation  $B$  then consists of  $n - 1$  such tuples:  $\{(a_k, m_k)\}_{k=1 \dots n-1}$ .

171 Finally, assume that candidate peptide  $P$  of length  $n$  has a minimal binary representation  $B$  as described  
 172 above. Then the residue evidence score  $\Psi$  between  $P$  and spectrum  $S$  is the sum of elements selected from  
 173 the residue evidence matrix  $R$  (derived from  $S$ ) according to the tuples in  $B$ :

$$\Psi(P, S) = \sum_{k=1 \rightarrow n-1} R_{a_k m_k} \quad (4)$$

### 174 2.3 Calibrating the residue evidence score via dynamic programming

175 The following assumes a spectrum  $S$  with precursor mass is  $m_S$  is being scored.

176 Let  $P^{(1 \rightarrow n)}$  be a peptide of length  $n$ , with mass  $m^{(1 \rightarrow n)} = m_S$  and amino acid sequence  $a_1, a_2, \dots, a_n$ .  
 177 Because  $\Psi(P, S)$  is additive, the score for matching  $S$  with  $P^{(1 \rightarrow n)}$  can be obtained by first calculating the  
 178 score for the prefix sequence  $P^{(1 \rightarrow n-1)} = a_1, a_2, \dots, a_{n-1}$ , then adding the evidence  $r = R_{a_n m_S}$  from the  
 179 residue evidence matrix  $R$ . Note that this process is equally valid for any subsequence  $P^{(1 \rightarrow k)} = a_1, a_2, \dots, a_k$   
 180 with mass  $m^{(1 \rightarrow k)}$ ,

$$\Psi(P^{(1 \rightarrow k)}) = \Psi(P^{(1 \rightarrow k-1)}) + R_{a_k m^{(1 \rightarrow k)}} \quad (5)$$

181 Let  $C_{s,m}$  be the count of peptides with mass  $m$  that produce a discretized score  $s$ . If (hypothetically) all  
 182 the peptides have the same terminal amino acid  $a$  with mass  $m_a$ , then we would have

$$C_{s,m} = C_{s-R_{a,m}, m-m_a} \quad (6)$$

183 Allowing for all naturally occurring amino acids  $a_i \in A$ , with masses  $m_{a_i}$ , the count becomes

$$C_{s,m} = \sum_{a_i \in A} C_{s-R_{a_i}, m-m_{a_i}} \quad (7)$$

184 Since  $\Psi(P, S)$  is additive, Eq. 7 is valid for all masses  $1 \leq m \leq m_S$ . Eq. 7 defines the basic recursion of the  
185 DP.

186 The DP computation of  $C$  is conducted in a two-dimensional array, where the rows are indexed by  $s$  and  
187 the columns by  $m$ . The number of rows is determined by an estimate of the largest possible score for  $S$ :

$$s_{max} = \sum_{i=n-q+1}^n Z_{(i)} \quad (8)$$

188 where  $Z_{(i)}$  refers to the sorted column maxima from  $R$  and  $q = \lceil m_S / \min\{m_{a_i \in A}\} \rceil$ .

189 We initially set:

- 190 •  $C_{0, T_N} \leftarrow 1$ , where  $T_N$  is the mass of the N-terminal group.
- 191 •  $C_{s,m} \leftarrow 0$  for all  $s \neq 0$  or  $m \neq 1$ . This includes a range of indices  $s < 1$  and  $m < 1$  that are accessed  
192 during the DP.

193 The elements of the array are then computed sequentially:

```

194 for  $m = T_N$  to  $m_S - T_C$  do
195   for  $s = s_0$  to  $s_{max}$  do
196      $C_{s,m} = \sum_{a_i \in A} C_{s-R_{a_i}, m-m_{a_i}}$ 
197   end for
198 end for

```

199 Above, the values  $T_N$  and  $T_C$  represent the masses of the N-terminal and C-terminal groups, respectively.  
200 Hence, the last column of the matrix  $C$  typically represents mass  $m_S - 17$ , since the C-terminal group is  
201 usually a hydroxyl. This column holds the desired distribution of  $X_R$  over all possible peptides consistent  
202 with  $m_S$ .

203 By using Eq. 7 in the DP, we make the assumption that all peptides are *a priori* equally likely. This  
204 is not biologically plausible, and, in fact, leads to distributions of  $\Psi(P, S)$  that lack appropriate statistical  
205 properties. This problem can be solved by considering the relative abundances of amino acids in the recursive  
206 counting:

$$C_{s,m} = \sum_{a_i \in A} C_{s-R_{a_i}, m-m_{a_i}} \cdot p_{a_i} \quad (9)$$

207 where  $p_{a_i}$  is the probability of finding amino acid  $a_i$  in a large collection of naturally occurring peptides,  
208 with  $\sum_{a_i \in A} p_{a_i} = 1$ . Note that it may be important to use different estimates of  $p_{a_i}$  for the N-terminus,  
209 C-terminus, and non-terminal positions, depending on the specificity of the enzyme used for digestion.

210 Assume we have calculated, using DP, the distribution of scores  $C_{s, m_S}$  over all possible peptides for  
211 spectrum  $S$ , where  $0 \leq s \leq s_{max}$ . Then the p-value relative to this distribution for a specific peptide  $P$ ,  
212 matched to  $S$  with residue evidence score  $\psi = \Psi(P, S)$ , is

$$p(\psi, C_{s, m_S}) = \frac{\sum_{s \geq \psi} C_{s, m_S}}{\sum_{0 \leq s \leq s_{max}} C_{s, m_S}}. \quad (10)$$

213 These p-values can be used in place of raw residue evidence scores during a standard database search.

## 214 2.4 Combining correlated p-values

215 The res-ev p-value and the XCorr p-value provide complementary yet not fully independent estimates of the  
216 quality of a given peptide-spectrum match (PSM). Accordingly, we employ a previously described method  
217 for assigning a p-value to the product of  $n$  correlated p-values (11), using the following equation:

$$Pr(Z_n \leq p) \approx p^y \sum_{i=0}^{\lfloor m \rfloor - 1} \frac{(-\ln p^y)^i}{i!} + p^y (m - \lfloor m \rfloor) \frac{(-\ln p^y)^{\lfloor m \rfloor}}{\lfloor m \rfloor!} \quad (11)$$



| Species           | instrument         | spectra | precursor (ppm) | proteins | peptides   |
|-------------------|--------------------|---------|-----------------|----------|------------|
| <i>Plasmodium</i> | LTQ Velos-Orbitrap | 12,748  | 50              | 11,737   | 746,911    |
| <i>E. coli</i>    | Q-Exactive         | 53,083  | 50              | 3,895    | 2,094,174  |
| Human             | LTQ Orbitrap Elite | 5,796   | 10              | 110,829  | 2,062,622  |
| Ocean             | Q-Exactive HF      | 98,137  | 10              | N/A      | 35,546,224 |

Table 1: **Mass spectrometry datasets.** The database used for the ocean data set is comprised of individual peptides derived from high-throughput sequencing reads, rather than full-length proteins.

218 where  $n$  is the number of p-values being multiplied (in our case,  $n = 2$ ),  $Z_n$  is the product of the p-values,  $m$   
219 is a parameter that can range from 1 to  $n$ , and  $y = m/n$ . The value of  $m$  indicates the degree of correlation  
220 among the  $n$  p-values, where total correlation (i.e., identical p-values) corresponds to  $m = 1$ , and total  
221 independence corresponds to  $m = n$ . In this setting, we used decoy p-values to empirically estimate  $m = 1.2$   
222 (Supplementary Figure 1) by minimizing the previously described error function:

$$E(m) = \sqrt{\sum_{i=1}^n [\log(p_i(m)) - \log(i/(n+1))]^2} \quad (12)$$

223 where  $p_i(m)$  is the  $i$ th largest p-value (of the product of p-values) in a set of  $n$  decoy p-values. Intuitively,  
224 this error function attempts to minimize the difference between the observed p-value distribution and an  
225 ideal, uniform distribution.

## 226 2.5 Data sets

227 We used four previously described tandem mass spectrometry data sets to validate our methods (Table 1).  
228 The data sets were selected to represent a diversity of both sample types and instrument types.

229 *Plasmodium falciparum* fraction (13): *P. falciparum* 3D7 was grown at 37° Celsius in RPMI-1640 culture  
230 medium. Following synchronization, infected cells were lysed using saponin. An 8 M urea lysis buffer was  
231 used to create parasite extracts, which were then reduced and alkylated. Proteins were digested using Lys-  
232 C, and the resulting peptides were labeled with TMT. Following TMT labeling, strong cation exchange  
233 chromatography (SCX) was used to fractionate the sample into 20 fractions. Fractions were analyzed on  
234 a LTQ Velos-Orbitrap mass spectrometer (Thermo Scientific). All MS1 and MS2 scans were acquired at  
235 high resolution. The data from fraction 13 was used in this study and contained 12,748 scans. The protein  
236 database used in the database search was downloaded from NCBI in October 2013 (*Plasmodium falciparum*  
237 3D7).

238 *Ocean metaproteome* (14): Water samples from the northern Chukchi Sea bottom waters were collected  
239 in the summer of 2013. To remove larger eukaryotes, each 15 L water sample was prefiltered through a 10  $\mu$ m  
240 and then a 1  $\mu$ m filter. The remaining liquid was collected onto a glass fiber filter and frozen. Cells were lysed  
241 using bead beating in 6 M urea. A total of 100  $\mu$ g of total protein were used for digestion. Prior to digestion,  
242 300  $\eta$ g of human ApoA1 protein was added and then the sample reduced and alkylated. Proteins were di-  
243 gested with trypsin and then desalted. Peptide separation was conducted using a NanoAquity HPLC with a  
244 4 cm precolumn and a 30 cm analytical column. Peptides were eluted at a rate of 300  $\eta$ L/min for 2 hours using  
245 a nonlinear gradient. Data was collected on a Q-Exactive HF (Thermo Scientific). The mass spectrometer  
246 was operated in a Top 20 data-dependent acquisition mode with a 5 second dynamic exclusion window. Ions  
247 only between 400-1600  $m/z$  were collected. This resulted in a dataset with 98,137 scans. The database used in  
248 the database search consists of a metapeptide database that was derived from shotgun metagenomic sequenc-  
249 ing of the same ocean sample ([https://noble.gs.washington.edu/proj/metapeptide/metapeptides\\_CS.fasta](https://noble.gs.washington.edu/proj/metapeptide/metapeptides_CS.fasta)).  
250 Briefly, a metapeptide database is a peptide database whose sequences are derived from raw read sequences  
251 that have been translated into peptides in all six reading frames (14).

252 *Human fraction* (15): Histologically normal adrenal gland tissue from three deceased individuals were  
253 pooled together using equal amounts of protein from each donor. Samples were lysed using SDS. The pro-  
254 tein sample was fractionated by SDS-polyacrylamide gel electrophoresis (SDS-PAGE). Then the protein

255 bands were destained, reduced, and alkylated. Protein digestion was performed using an in-gel trypsin di-  
256 gestion. Following digestion, the peptides were desalted. The resulting peptide sample was separated with  
257 a 60 min linear gradient using reversed-phase liquid chromatography on an Easy-nLC II nanoflow liquid  
258 chromatography system (Thermo Scientific). Data was acquired using a LTQ-Orbitrap Elite (Thermo Sci-  
259 entific). The mass spectrometer was operated in a Top 20 data-dependent acquisition mode with a 30  
260 second dynamic exclusion window. MS1 scans were acquired at a mass resolution of 120,000 at 400  $m/z$ .  
261 MS2 scans were acquired at a mass resolution of 30,000 at 400  $m/z$ . This study used data from the  
262 first fraction, which contained 5,796 scans. Each chromosome's "protein.faa" was downloaded from RefSeq  
263 ([ftp://ftp.ncbi.nlm.nih.gov/refseq/H\\_sapiens/mRNA\\_Prot](ftp://ftp.ncbi.nlm.nih.gov/refseq/H_sapiens/mRNA_Prot)) in September 2016 and concatenated to form the  
264 human protein database.

265 *E. coli* fraction (16): A yfgM knockout strain and WT strain of *E. coli* MC4100 was cultured at 37° Celsius  
266 in LB broth (Difco, Sparks, MD). Cells were harvested using centrifugation once the OD<sub>600nm</sub> reached ~.08.  
267 Cellular pellets were suspended in a lysis buffer and then lysed by rapidly passaging the cells through a  
268 hypodermic syringe needle and by sonication. Proteins were then reduced, alkylated, and then reduced  
269 a second time. A 4 hour digestion step with Lys-C was followed by an overnight trypsin digestion. The  
270 resulting peptides were chemically labeled using stable isotope dimethyl labeling. The yfgM knockout lysate  
271 was labeled with the "Medium" isotope and the the WT sample was labeled with the "Heavy" isotope.  
272 These lysates were mixed together in a 1:1 ratio and then fractionated into 45 fractions using strong cation  
273 exchange. Samples were analyzed on a Q-Exactive (Thermo Scientific) coupled to a Easy UHPLC (Thermo  
274 Scientific) system. Peptides were eluted during a 3 hour gradient with a flow rate of 100  $\eta$ L/min. The Q-  
275 Exactive instrument was operated in a Top 20 data-dependent acquisition mode. MS1 scans were acquired  
276 at a mass resolution of 35,000. MS2 scans were acquired at a mass resolution of 17,500. The 21<sup>st</sup> fraction  
277 was used for this study and contained 53,083 scans. The protein database used in the database search was  
278 downloaded from Uniprot in December 2017 (*Escherichia coli* str. K-12 substr. MC4100).

## 279 2.6 Target-decoy evaluation

280 For this work, we used the following publicly available database search engines.

- 281 • Crux version 3.1 (<http://crux.ms>; linux version) was used to generate combined p-value, res-ev p-value,  
282 XCorr p-value, and high-resolution XCorr (7, 17, 18)
- 283 • MS-GF+ version v2016.12.12 (<https://omics.pnl.gov/software/ms-gf>) (19)
- 284 • MS Amanda version 1.0.0.7504 (<http://ms.imp.ac.at/?goto=msamanda>; linux version) (20)
- 285 • Morpheus version 272 (<http://cwenger.github.io/Morpheus/>; linux version) (4)

286 We took great care to ensure a fair comparison of results across all database search engines. One of  
287 the more important ways we accomplished this goal was to try to guarantee that all the database search  
288 engines considered a common set of target and decoy peptides. To this end, we took several non-standard  
289 steps in our analysis. First, we predigested our protein fasta files *in silico* using the tide-index tool in Crux.  
290 This predigestion did not include suppression of cleavage by proline, because not all search engines use this  
291 rule. Decoy peptides were generated by tide-index by shuffling the amino acid sequence of each peptide,  
292 leaving the N-terminal and C-terminal amino acids in place. For this digestion, no missed cleavages were  
293 allowed, and N-terminal peptides with a leading methionine were included in two copies, with and without  
294 the methionine. Peptides shorter than six amino acids and peptides with one or more non-enzymatic termini  
295 were not considered. The resulting target and decoy peptides were placed into a new .fasta file. The words  
296 'target' and 'decoy' were appended to the peptide headers of the peptides in their respective .fasta files.  
297 Then the target and decoy .fasta file were concatenated to create a target-decoy database for MS Amanda.

298 Because it is not possible to turn off N-terminal methionine clipping in MS Amanda, in order to ensure  
299 that the other three database search tools were exposed to the same peptides as MS Amanda, we then  
300 subjected the predigested .fasta files to a second round of "digestion". In this second round, no missed  
301 cleavages were allowed, N-terminal methionines were allowed to be clipped, and peptides shorter than five  
302 amino acids were removed. Since the .fasta files that went through the second round were pre-digested,  
303 this next step only performed clipping of N-terminal methionines. The resulting target and decoy peptide



304 files were then concatenated to create a target-decoy database for MS-GF+, Morpheus, and Crux. This  
305 predigestion strategy ensured that all search engines considered the same set of candidates. Note that,  
306 subsequent to the searches, we also checked that each detected peptide was indeed present in the .fasta  
307 database.

308 In addition to ensuring the database search engines considered the same set of targets and decoys, we  
309 tried to match the experimental parameters in each database search as exactly as possible. We removed  
310 any MS2 scans that had fewer than 10 peaks in it. All searches were run with full digestion (*i.e.* no missed  
311 cleavages). No non-enzymatic termini and no isotope errors were allowed. The maximum precursor charge  
312 was set to 25 (*E. coli*), seven (human and ocean), or nine (*Plasmodium*). The *E. coli*, human, and ocean  
313 sample were run with trypsin as the digestion enzyme, while the *Plasmodium* sample was run with Lys-C  
314 as the digestion enzyme. The proline rule was ignored for all runs. The precursor mass tolerance was set  
315 to 50 ppm for the *E. coli* and *Plasmodium* runs and 10 ppm for the human and ocean runs. We set the  
316 fragment mass tolerance at 0.02 Da for combined p-value, res-ev p-value, MS Amanda, and Morpheus for  
317 all four datasets; however, we were unable to set the fragment mass tolerance for MS-GF+ as it is not  
318 a user-level parameter. For MSGF+, we can somewhat control the fragment mass tolerance by correctly  
319 setting the user-level parameters of 'inst' and 'm'. For the human and *Plasmodium* dataset, we set 'inst' to  
320 1 and 'm' to 3. These settings correspond to high-resolution MS2 scans that were generated by HCD. For  
321 the ocean and *E. coli* sample, we set 'inst' to 3 and 'm' to 3. These settings correspond to high-resolution  
322 MS2 scans that were generated by a Q-Exactive. For all four datasets, we allowed a fixed carbamidomethyl  
323 modification to cysteine and a variable methionine oxidation modification. In addition we allowed a variable  
324 light, intermediate, and heavy dimethyl label (28.0313, 32.0564 and 36.0757 Da, respectively) on lysines  
325 and the N-terminus for the *E. coli* run. For the *Plasmodium* run, we included a fixed TMT modification  
326 (229.16293 Da) on lysines and the N-terminus. Methionine clipping was turned off for Crux, Morpheus, and  
327 MS-GF+ since the input .fasta file already contained clipped peptides. All search engines runs were done  
328 in target-only mode since the peptide headers in the concatenated target-decoy .fasta file already denoted  
329 whether it was a target or decoy peptide. The exact commands used to run the database searches can be  
330 found in Supplementary File 5.

331 A custom R script (Supplemental File 3) was used to combine the results of the various search engines  
332 together into a single table. Each row represents the PSM that each database search detected for a particular  
333 scan. For each row (scan) the combined p-value, res-ev p-value, XCorr p-value, SpecValue (MS-GF+),  
334 weighted probability (MS Amanda), and Morpheus scores are listed in Supplemental File 2. In addition,  
335 the peptide that each score function detected, and whether that peptide is a target or decoy, is also listed.  
336 The value 'NA' is placed into empty cells that result from one score function scoring a scan and another  
337 score function not scoring that particular scan. This phenomenon is due to each program having a different  
338 threshold for the minimum number of peaks required to score a scan. A second R script used the PSM table  
339 as input to calculate false discovery rates and generated the plots for this publication (Supplemental File 4).  
340 We used the following false discovery rate equation:  $FDR = (\text{number of decoys} + 1) / \text{number of targets}$   
341 (21).

## 342 2.7 Percolator analysis

343 For the Percolator analysis, the Tide search was performed as described previously, except that during index  
344 creation, the "digestion" option was set to "partial-digest" and one missed cleavage was allowed ("missed-  
345 cleavages=1"). This setting allows Percolator to more effectively re-rank various types of PSMs, while taking  
346 into account their digestion conditions. We then applied the Crux implementation of Percolator directly to  
347 the Tide search results. The resulting feature vector contains, in addition to the standard Percolator features,  
348 three separate scores for each PSM: the negative logarithms of the combined p-value, res-ev p-value, and  
349 XCorr p-value. All default Percolator parameters were used except that "only-psms" was set to true. Note  
350 that PSM-level FDR is estimated by Percolator using target-decoy competition (including the +1 correction  
351 to the number of decoys).

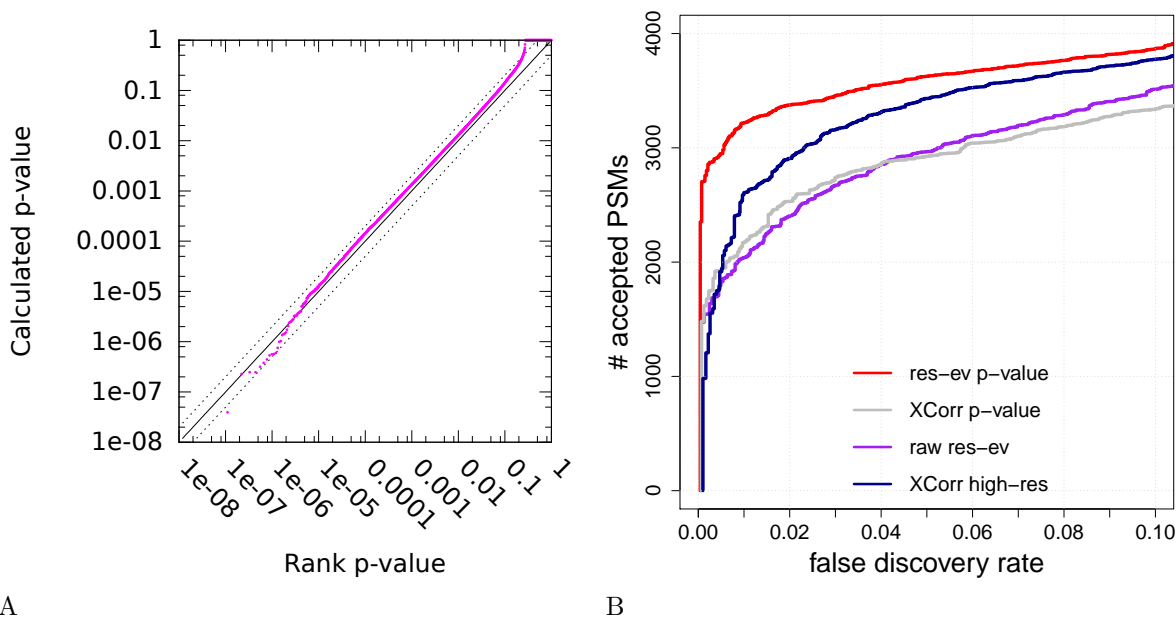

Figure 2: **Calibration of the residue evidence score via dynamic programming.** (A) The figure plots the p-value, as calculated via dynamic programming, versus the rank p-value, for decoy PSMs from a *Plasmodium* dataset. The lines  $y = x$  (solid line),  $y = 2x$  (dotted line) and  $y = 0.5x$  (dotted line) are included for reference. (B) The figure plots, for the *Plasmodium* dataset, the number of PSMs accepted as a function of  $q$ -value threshold, for four different database search methods: XCorr calibrated via dynamic programming using low-resolution  $m/z$  bins, uncalibrated XCorr using high-resolution  $m/z$  bins, uncalibrated res-ev, and res-ev calibrated via dynamic programming.

### 3 Results

#### 3.1 Statistical validation of residue-evidence p-value

For any observed spectrum, we can use dynamic programming to determine the exact distribution of residue-evidence scores that result from each possible peptide sequences whose discretized mass matches the discretized precursor mass. We can then compare the score from a particular PSM to this distribution and calculate a p-value, i.e., we compute the probability of observing a residue-evidence score greater than or equal to the score of a particular PSM.

To test the validity of the resulting p-values, we searched real data against a decoy database. Specifically, we searched the *Plasmodium* data set against a shuffled *Plasmodium* database (see Methods for details) using a wide precursor mass tolerance of 3 Da. Because the decoy peptides have been shuffled, we expect all of the resulting PSMs to be incorrect. Hence, in this setting, our p-values should be uniformly distributed; i.e., the probability of observing a p-value less than or equal to, say, 0.05 should be 5%. A quantile-quantile plot (Figure 2A) of the calculated p-values against the rank of the p-values confirms that the residue-evidence p-values are generally uniform. However, we noticed a trend away from  $y = x$  among large p-values (horizontal line in the upper right hand corner of Figure 2A), as well as an overall upward shift of the p-value distribution shown in the figure. These two phenomena arise because of the discrete nature of the res-ev score. In practice, many PSMs result in a residue-evidence score of 0, leading to an inflation of p-values of 1.0 and a consequent decrease in the remaining p-values. Overall, the near uniformity of the empirical res-ev p-values indicates that they provide an accurate assessment of the statistical confidence associated with a given PSM.

#### 3.2 Residue-evidence works well for high-resolution data

Having established the validity of the res-ev p-value, we next sought to measure the statistical power of the score function in the context of a real database search. For this test, we again used the *Plasmodium*

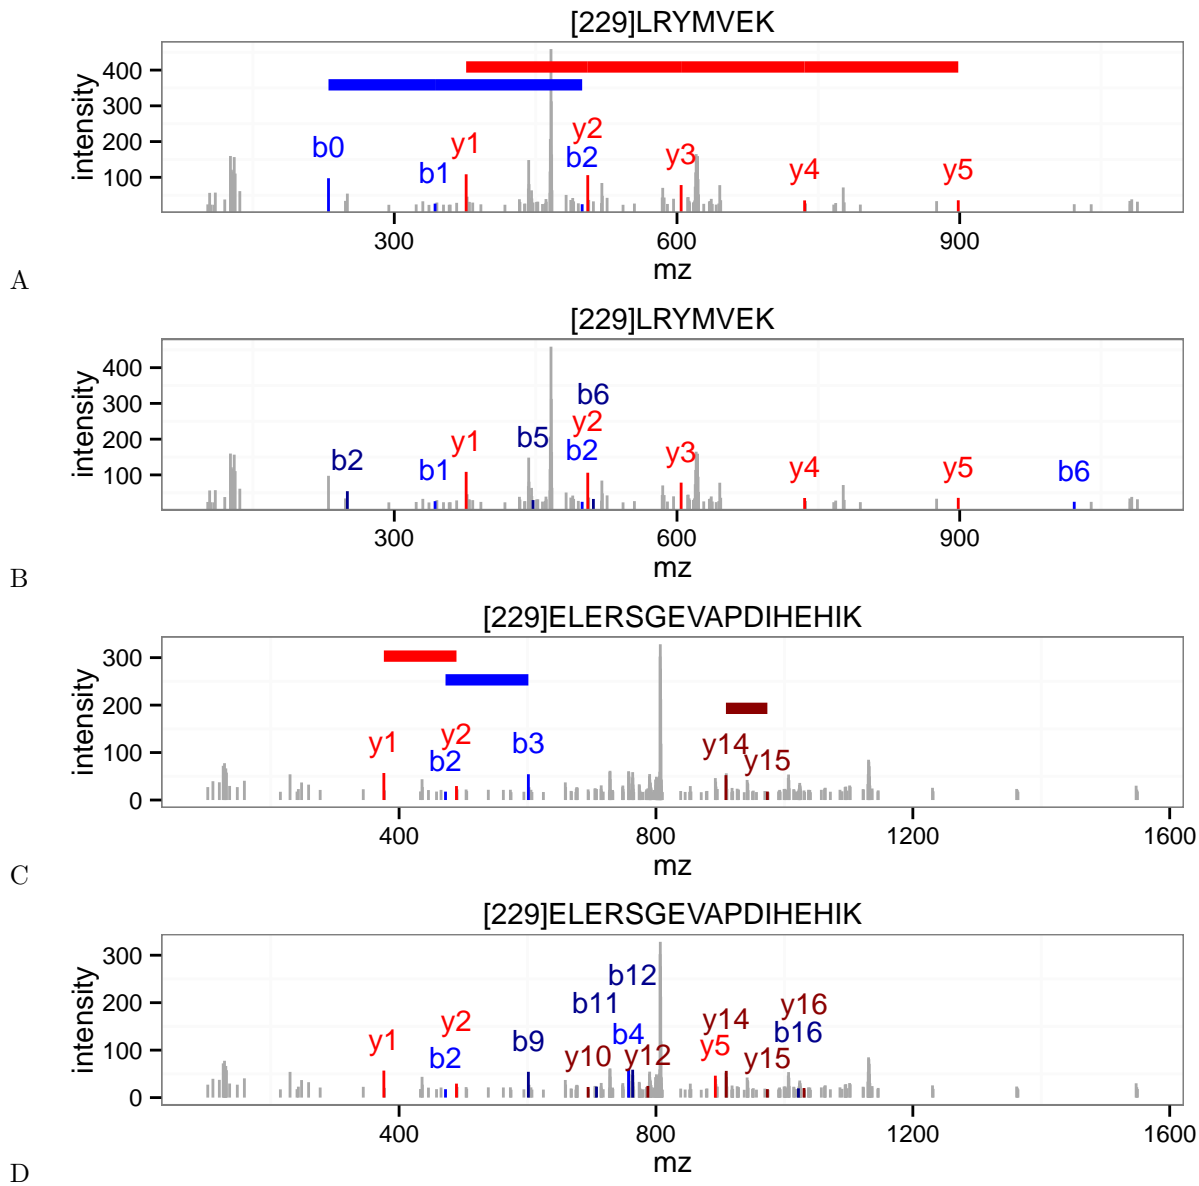

Figure 3: **Disagreements between the XCorr score and the residue-evidence score.** (A) An annotated *Plasmodium* spectrum (scan 5468) that received a low (i.e., good) p-value from the residue-evidence score. Colored horizontal lines indicate the locations of peak-pairs that contribute to the residue-evidence score. (B) Same as (A), but annotated using XCorr. This scan received a high XCorr p-value. (C) *Plasmodium* scan 11156, annotated with res-ev, with a high p-value. (D) Same as (C), but annotated using XCorr, with a low p-value. In each panel, peaks colored in blue, dark blue, red, and dark red represent b+1, b+2, y+1, y+2 ions, respectively.

374 data set, but we searched against a concatenated database of both real (“target”) and shuffled (“decoy”)   
 375 peptide sequences. From the resulting ranked list of PSMs, we used target-decoy analysis to estimate the   
 376 false discovery rate (FDR) associated with each observed PSM score (22). We measured FDR out to a   
 377 maximum of 10%, reasoning that higher FDR thresholds are not likely to be of much practical value. For   
 378 comparison, we repeated our search with three other score functions: the uncalibrated res-ev score function,   
 379 the uncalibrated high-res XCorr score function, and the XCorr p-value. Note that the latter necessarily   
 380 discards the high resolution of the fragment m/z axis, because the XCorr dynamic programming procedure   
 381 requires  $\sim 1$  Da bins.

382 The results (Figure 2B) clearly show that the res-ev p-value score function outperforms the three compet-   
 383 ing methods. Focusing on the commonly used FDR threshold of 0.01, we see that the res-ev p-value detected   
 384 3,217 PSMs. This corresponds to an increase of 1178 (57.78%) PSMs relative to the raw residue-evidence   
 385 score, 1,047 (48.25%) PSMs relative to the XCorr p-value and 609 (23.35%) PSMs relative to high-resolution   
 386 XCorr. Thus, this experiment suggests that taking simultaneous advantage of statistical calibration and   
 387 high-resolution data improves performance.

388 A complementary measure of the quality of a PSM score function is the “target match percentage”   
 389 (TMP), which is defined as the fraction of spectra for which the top-scoring match involves a target peptide   
 390 (23). For a perfectly random score function, we expect the TMP to be  $\sim 50\%$ . The best possible TMP is   
 391 100%; however, in practice any real data set will contain spectra that cannot be identified, either because   
 392 the corresponding generating peptide is not in the given peptide database or because the spectrum was   
 393 generated by a non-peptide contaminant. TMP provides a measure of the quality of a score function that is   
 394 independent of a score function’s calibration. This is because the TMP never involves comparing scores for   
 395 PSMs involving different spectra. Hence, the distribution of PSM scores for spectrum *A* can be dramatically   
 396 different from the distribution of PSM scores for spectrum *B*, but the TMP achieved by the score function   
 397 can still be high.

398 In the *Plasmodium* TMP analysis, the res-ev p-value (and, by definition, also the raw res-ev score)   
 399 achieved the best TMP of 65.08% (8,172 PSMs). High-resolution XCorr yielded the second best TMP of   
 400 64.20% (8,061 PSMs). Not surprisingly, XCorr p-value, which discards high-resolution m/z information, had   
 401 the worst TMP (63.94%, or 8,029 PSMs).

402 In order to better understand the differences in scoring between XCorr and residue-evidence, we looked   
 403 at several spectra where XCorr p-value and res-ev p-value greatly disagreed on the significance of their best   
 404 PSMs. Figure 3 shows two such spectra (scans 5468 and 11156) from the *Plasmodium* dataset that have   
 405 been annotated by both XCorr and residue-evidence.

406 Scan 5468 (Figure 3A–B) corresponds to a case where the PSM is given a small residue-evidence p-value   
 407 and a large XCorr p-value. Specifically, although this scan was assigned the same peptide (LRYMVEK) by   
 408 both score functions, the resulting PSM received a p-value of  $5.13 \times 10^{-4}$  (0.32% FDR) from residue-evidence   
 409 and a p-value of  $7.20 \times 10^{-1}$  (48.50% FDR) from XCorr. The source of this difference is not immediately   
 410 obvious, because the numbers of peaks annotated by the two score functions are similar. The only additional   
 411 ions that XCorr identifies over residue-evidence are the doubly charged b2, b5, and b6 ions and the singly   
 412 charged b6 ion. This PSM scores well according to the res-ev score function because the spectrum contains   
 413 two long “ladders” of consecutive peaks (y1 to y5, and b0 to b2). These ladders are particularly unlikely   
 414 according to a null model in which each peak is treated independently. Conversely, the poor score from   
 415 XCorr may arise because most of the annotated peaks have low intensities. Note that the res-ev score did   
 416 not annotate the doubly charged b5 and b6 ions because the mass difference between these two peaks was   
 417 too different from the mass of glutamate. This speaks to the power of using high resolution on the MS2 m/z   
 418 axis.

419 In contrast, scan 11156 (Figure 3C–D) illustrates why some PSMs score well using XCorr and poorly   
 420 using residue-evidence. This scan was assigned the same peptide (ELERSGEVAPDIHEHIK) by both score   
 421 functions, but the resulting PSM received a high p-value ( $8.45 \times 10^{-1}$ , 47.4% FDR) from residue-evidence   
 422 and a low p-value ( $1.11 \times 10^{-2}$ , 3.4% FDR) from XCorr. The disparity between the two score functions   
 423 arises because, using residue-evidence, only three pairs of peaks contribute to the score. In contrast, the   
 424 XCorr score includes individual components corresponding to sixteen different fragment ions (b2, b3, b4,   
 425 b7, b9, b11, b12, b16, y1, y2, y5, y10, y12, y14, y15, and y16). In Figure 3D, there are only fourteen   
 426 colored fragment ions because the b3 and b9 ion correspond to the same peak and the b7 and the y16 ion   
 427 also correspond to the same peak. The lack of a long “ladder” of successive b- or y-ion peaks keeps the

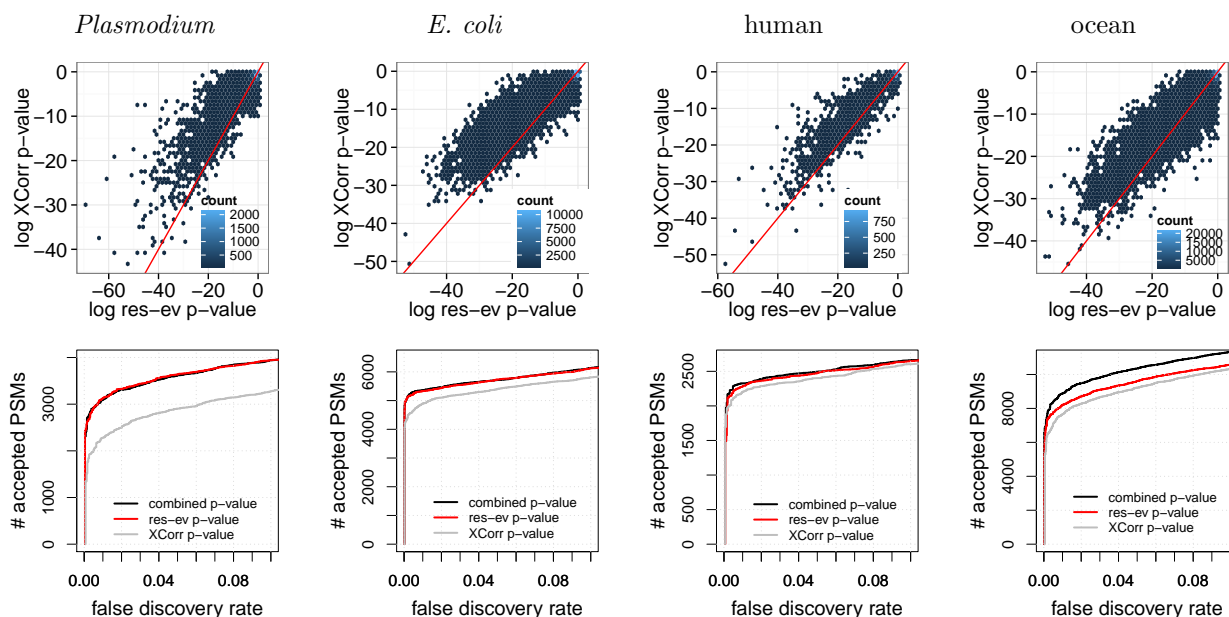

Figure 4: **Combining XCorr and res-ev.** (Top row) Each panel plots, for a specified dataset, a density plot of p-values from XCorr (y-axis) versus res-ev (x-axis). The points are binned into hexagons, and the color of each hexagon represents the number of points within each bin. The red line represents  $y = x$ . (Bottom row) Each panel plots the number of PSMs accepted as a function of FDR threshold, for three different database search methods: XCorr p-value, res-ev p-value, and combined p-value.

428 residue-evidence score low, relative to XCorr.

### 429 3.3 Combining the two scores yields improved power

430 The two scans in Figure 3 clearly suggest the need for a score function that can combine the res-ev p-value  
 431 and the XCorr p-value, thereby potentially correctly identifying both scans 3667 and 11156. Estimating  
 432 the p-value for the product of a pair of independent p-values is relatively straightforward; however, in our  
 433 case, the res-ev and XCorr p-values are clearly not independent since they are derived from the same  
 434 PSM. To verify this lack of independence, we computed the res-ev p-value and XCorr p-value for four different  
 435 data sets. These data sets were selected for diversity: they represent different proteome sizes, digestion  
 436 enzymes (trypsin and Lys-C), instruments (LTQ Orbitrap Velos, Q-Exactive, and LTQ-Orbitrap Elite), and  
 437 instrument resolutions. The strong  $y = x$  component in each of the resulting density plots (Figure 4, top  
 438 row) indicates a strong lack of independence. We also note that, in general, res-ev shows an enrichment of  
 439 very small p-values compared to XCorr.

440 To combine these two scores, we applied a previously described method for estimating the statistical  
 441 significance of the product of correlated p-values (24) (see Methods for details). We hypothesized that the  
 442 resulting combined p-value would perform better than res-ev or XCorr because these two score functions  
 443 take advantage of different types of evidence in the spectrum: the res-ev p-value focuses on adjacent pairs  
 444 of peaks, whereas the XCorr p-value focuses on single peaks.

445 To test this hypothesis, we compared the performance of res-ev p-value, XCorr p-value and the combined  
 446 p-value on four data sets. The results (Figure 4, bottom row) show that the combined p-value is generally  
 447 the best-performing method. Notably, however, in three out of the four cases, the performance of combined  
 448 p-value is comparable to res-ev p-value. In two out of the three cases, combined p-value identified only 35  
 449 (0.67%, *E. coli*) and 51 (2.24%, human) more PSMs than res-ev p-value at a 1% FDR threshold. In the third  
 450 case, combined p-value did marginally worse than res-ev p-value: at a 1% FDR, combined p-value detected  
 451 29 (0.94%) fewer PSMs than res-ev p-value for the *Plasmodium* dataset. Only in the ocean dataset did the  
 452 combined p-value yield a large increase in performance (817 PSMs, or 11.01%). Conversely, XCorr p-value

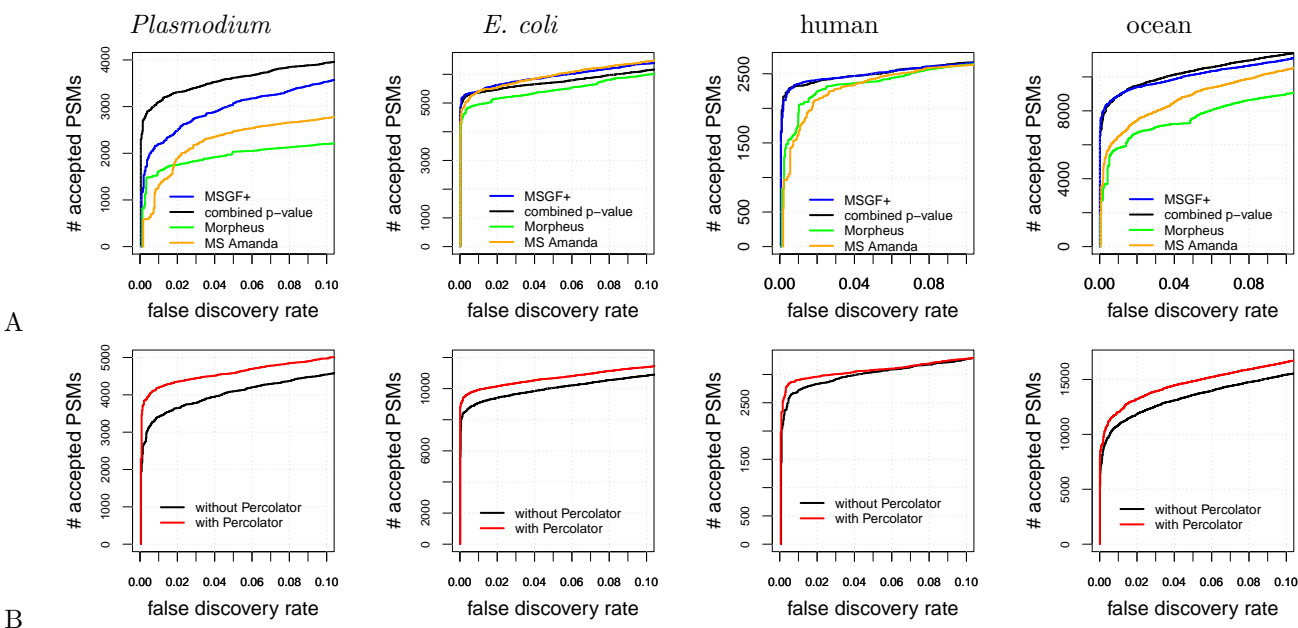

Figure 5: **Comparison with existing methods.** (A) The panel plots, for four datasets, the number of PSMs accepted as a function of FDR threshold for four different database search methods: MS-GF+, combined p-value, MS-Amanda, and Morpheus. (B) Similar to (A), but the two series correspond to the combined p-value with and without post-processing via Percolator.

453 tends to perform poorly in all cases. Overall, these results suggest that combining res-ev with XCorr does  
 454 not lead to decreased performance and occasionally yields a performance increase relative to using the res-ev  
 455 p-value alone.

### 456 3.4 Comparison with existing methods

457 Finally, we compared the combined p-value with three existing methods that take advantage of high-  
 458 resolution tandem mass spectra: MS Amanda, Morpheus, and MS-GF+. MS Amanda and Morpheus are  
 459 designed to take advantage of high-resolution tandem mass spectra but are not statistically calibrated. MS-  
 460 GF+, like res-ev p-value and combined p-value, takes simultaneous advantage of statistical calibration and  
 461 high-resolution MS2.

462 We found that, in general, combined p-value and MS-GF+ outperformed MS Amanda and Morpheus  
 463 over the entire 0–10% FDR range (Figure 5A). For example, combined p-value detected 1781 (135.33%),  
 464 711 (44.02%), and 2414 (37.33%) more PSMs than MS Amanda at a 1% FDR for the *Plasmodium*, human,  
 465 and ocean samples, respectively. Similar respective improvements of 1479 (91.41%), 404 (21.02%), and 3074  
 466 (52.95%) were observed for the combined p-value relative to Morpheus, as well as for MS-GF+ relative to  
 467 MS Amanda and Morpheus. The one exception was the *E. coli* dataset, where MS Amanda performed  
 468 comparably to MS-GF+ and slightly better than the combined p-value. Nonetheless, we interpret the  
 469 performance improvement that the combined p-value and MS-GF+ offer over MS Amanda and Morpheus  
 470 as evidence of the value of having a statistically calibrated score.

471 When we focus on the comparison between the combined p-value and MS-GF+, no clear winner emerges.  
 472 For three datasets, *E. coli*, human, and ocean, MS-GF+ marginally outperformed combined p-value at a 1%  
 473 FDR threshold. Qualitatively, we observe on the *E. coli* dataset that the difference between MS-GF+ and  
 474 the combined p-value is relatively small for low FDR thresholds—e.g., at a 1% FDR, MS-GF+ yields only  
 475 42 (0.78%) more PSMs than the combined p-value—but increases for larger FDR thresholds. Conversely, for  
 476 the human dataset the difference between MS-GF+ and the combined p-value is largest (24 PSMs or 1.03%)  
 477 at around 1% FDR, but then this difference all but disappears for large FDR thresholds. In contrast to the  
 478 prior two datasets, for the ocean dataset MS-GF+ identified 8 (0.09%) more PSMs relative to combined p-



|                   | combined p-value | MS-GF+ | Morpheus | MS Amanda |
|-------------------|------------------|--------|----------|-----------|
| <i>Plasmodium</i> | 65.03%           | 63.96% | 66.86%   | 60.80%    |
| human             | 72.57%           | 71.23% | 73.20%   | 72.19%    |
| <i>E. coli</i>    | 56.47%           | 56.72% | 58.64%   | 57.21%    |
| ocean             | 55.71%           | 55.46% | 57.44%   | 56.06%    |

Table 2: **Target match percentages.** The TMPs of four score functions (rows) for four datasets (columns). The TMP is defined as the percentage of spectra that match a target peptide.

479 value at a 1% FDR threshold. However, at larger FDR thresholds, combined p-value consistently performed  
480 better than MS-GF+. Finally, for the *Plasmodium* dataset, we observed that combined p-value performed  
481 dramatically better than MS-GF+ across the entire FDR range, with an improvement of 899 PSMs (40.90%)  
482 at a 1% FDR.

483 Comparing the target match percentages of combined p-value, MS-GF+, Morpheus, and MS Amanda  
484 yielded unexpected results. In contrast to the comparison shown in Figure 5, where Morpheus consistently  
485 performed worse than the other score functions, in the TMP comparison Morpheus performed better than  
486 the other score functions. Morpheus’s TMP was higher than the second-best TMP by 1.83%, 0.63%, 1.43%,  
487 and 1.38% for the *Plasmodium*, human, *E. coli*, and ocean datasets, respectively. Among the remaining three  
488 methods, the TMP values for most of the data sets were remarkably similar to each other, spanning ranges  
489 of 71.23–72.57% (human), 56.47–57.21% (*E. coli*), and 55.46–56.06% (ocean), respectively. The TMP values  
490 were slightly more variable for the *Plasmodium* dataset, but even in this case, Morpheus was a clear winner.  
491 These results suggest that Morpheus is doing a very good job of identifying the correct candidate peptide  
492 for each spectrum, and perhaps suffers in the calibration of its scores from one spectrum to the next.

### 493 3.5 Using Percolator in conjunction with combined p-value improves power

494 In practice, in most proteomics experiments a post-processor such as Percolator (25) or PeptideProphet (26)  
495 is used to reanalyze the database search results to improve performance. Therefore, we tested whether the  
496 performance of combined p-value can be improved by post-processing via Percolator. We ran the combined  
497 p-value database search for all four datasets, as previously described, except that we allowed the peptide  
498 database to contain semi-tryptic peptides and peptides with one missed cleavage. This approach provides  
499 Percolator the opportunity to re-rank PSMs while taking into account their digestion conditions. Following  
500 the database search, we reanalyzed the database results with Percolator. We found that combined p-value  
501 with Percolator performed better than combined p-value by itself for all four datasets over the entire 0–10%  
502 FDR range (Figure 5B). At a 1% FDR, Percolator identifies an additional 778 (22.8%), 844 (9.30%), 182  
503 (6.69%), and 1180 (10.89%) PSMs for the *Plasmodium*, *E. coli*, human, and ocean datasets, respectively.

## 504 4 Discussion

505 The residue-evidence p-value is reminiscent of the original XCorr score employed by SEQUEST but is  
506 designed to take simultaneous advantage of statistical calibration and high-resolution tandem mass spectra.  
507 By combining residue-evidence p-values with XCorr p-values, we obtain state-of-the-art performance in  
508 identifying tandem mass spectra. The resulting search engine is freely available in the open source Crux  
509 mass spectrometry toolkit (<http://crux.ms>).

510 The number of search engines available to process shotgun proteomics mass spectrometry data is large and  
511 growing (reviewed in (3)). Given this diversity of approaches and the different results produced by each search  
512 engine, it is only natural to attempt to search the same data with multiple methods and combine the results  
513 in a post-processing stage. Indeed, a wide variety of methods have been developed that adopt this approach,  
514 including methods that aggregate PSMs and then re-estimate FDRs on the aggregated results (27–29),  
515 combine statistical confidence measures (30), compute probabilities for each method and then combine these  
516 probabilities (31–34), or run a machine learning post-processor on the combined results (35). Our empirical  
517 results suggest that the res-ev score function and its combined p-value provide yet another complementary  
518 view of peptide-spectrum matching, which will likely add value in the context of such aggregation schemes.

519 One potential explanation for the relatively poor performance of MS-GF+ on the *Plasmodium* dataset  
520 is due to the unusual nature of the data itself. MS-GF+ uses a supervised machine learning algorithm to  
521 learn a scoring model. To perform well on the *Plasmodium* data might require a model that was trained on  
522 data with TMT labeling and digestion with Lys-C. In contrast, the combined p-value approach is invariant  
523 to properties of the data, such as digestion and labeling schemes.

524 A potential area for future work lies in the method for combining XCorr and res-ev p-values. We  
525 empirically set the parameter  $m$ , which represents the degree of dependency between the two types of p-  
526 values, to be 1.2. However, in principle this value could be re-estimated for each new data set, using a  
527 strategy similar to that shown in Supplementary Figure 1. However, our empirical results (not shown)  
528 suggest that the behavior of the method is not strongly dependent upon the choice of  $m$ .

529 The strong performance of the Morpheus search engine as measured by TMP suggests that this score  
530 does a good job of identifying the generating peptide for a given spectrum. On the other hand, the poor  
531 overall performance of Morpheus suggests that the score function is poorly calibrated. This is not surprising,  
532 because the score is simply the sum of two terms: the number of matched product ions, and the fraction of the  
533 observed peak intensities that can be assigned to matched products. Thus, longer peptides or spectra with  
534 more peaks will tend to achieve higher Morpheus scores on average. Our results suggest that a calibrated  
535 version of this score function should be able to achieve very good empirical performance.

536 In addition to proposing a new score function, we have provided a new benchmark for use in evaluating  
537 novel score functions. On the surface, it seems deceptively easy to compare results across score functions:  
538 run the score functions on the set same of input spectra and peptides and then compare the results. However,  
539 in reality, it is much harder to fairly compare score functions because search engines differ in many ancillary  
540 ways: digestion rules, decoy generation, etc. By merging all of the PSMs from different search engines, for a  
541 given dataset, into a single table indexed by scan number (Supplementary Tables 1-4), and by ensuring that  
542 all the reported peptides appear in a shared peptide list, we ensure that the performance evaluation focuses  
543 on properties of the score function, rather than less interesting properties of the digestion rules or candidate  
544 peptide selection procedure.

## 545 Supplemental files

546 The following supplemental files can be found in PRIDE under accession PXD009265.

- 547 1. ***E. coli* peptide database (ecoliPSMDb.txt.gz)**. The tab-delimited file contains the following  
548 columns: peptide sequence, peptide mass, an indication of whether the peptide is a target or decoy,  
549 and a comma-separated list of the IDs of proteins containing this peptide. Dynamic modifications are  
550 indicated using bracket notation. Static modifications are not indicated. Decoy peptides do not have  
551 protein IDs associated with them.
- 552 2. **Human peptide database (humanPSMDb.txt.gz)**. The tab-delimited file contains the following  
553 columns: peptide sequence, peptide mass, an indication of whether the peptide is a target or decoy,  
554 and a comma-separated list of the IDs of proteins containing this peptide. Dynamic modifications are  
555 indicated using bracket notation. Static modifications are not indicated. Decoy peptides do not have  
556 protein IDs associated with them.
- 557 3. **Ocean metaproteome peptide database (oceanPSMdb.txt.gz)**. The tab-delimited file contains  
558 the following columns: peptide sequence, peptide mass, an indication of whether the peptide is a  
559 target or decoy, and a comma-separated list of the IDs of proteins containing this peptide. Dynamic  
560 modifications are indicated using bracket notation. Static modifications are not indicated. Note that  
561 none of the peptides have protein IDs associated with them, because the peptides came from shotgun  
562 sequencing data. Therefore, instead of the protein IDs, we substitute the entire sequence from which  
563 the peptide was derived.
- 564 4. ***Plasmodium* peptide database (plasmodiumPSMDb.txt.gz)**. The tab-delimited file contains  
565 the following columns: peptide sequence, peptide mass, an indication of whether the peptide is a  
566 target or decoy, and a comma-separated list of the IDs of proteins containing this peptide. Dynamic  
567 modifications are indicated using bracket notation. Static modifications are not indicated. Decoy  
568 peptides do not have protein IDs associated with them.

- 569 5. **PSMs (psmFile.txt.gz)**. The tab-delimited file contains the following columns: name of the file that  
570 the spectrum resides in, scan number, charge, precursor m/z, and then for each search method the  
571 score and peptide sequence.
- 572 6. **R script 1 (createFinalFile.R)**. This file contains the R script for creating the PSMs file (Supple-  
573 mental File 2). The figures from this publication were generated from this file.
- 574 7. **R script 2 (rankingCurveFromFinalFile.R)**. This file contains the R script for generating the  
575 figures in this publication.
- 576 8. **Commands (commands.txt)**. Text file containing the database search commands, for various search  
577 engines, used to search the *E. coli* sample against the *E. coli* peptide database.

## 578 Funding

579 This work was funded by NIH awards R01 GM121818 and P41 GM103533.

## 580 References

- 581 [1] T. Muth and B. Y. Renard. Evaluating de novo sequencing in proteomics: already an accurate alternative  
582 to database-driven peptide identification? *Briefings in Bioinformatics*, 2017. Epub ahead of print.
- 583 [2] J. K. Eng, A. L. McCormack, and J. R. Yates, III. An approach to correlate tandem mass spectral data  
584 of peptides with amino acid sequences in a protein database. *Journal of the American Society for Mass  
585 Spectrometry*, 5:976–989, 1994.
- 586 [3] A. I. Nesvizhskii. A survey of computational methods and error rate estimation procedures for peptide  
587 and protein identification in shotgun proteomics. *Journal of Proteomics*, 73(11):2092 – 2123, 2010.
- 588 [4] C. D. Wenger and J. J. Coon. A proteomics search algorithm specifically designed for high-resolution  
589 tandem mass spectra. *Journal of Proteome Research*, 12(3):1377–1386, 2013.
- 590 [5] S. Kim, N. Gupta, and P. A. Pevzner. Spectral probabilities and generating functions of tandem mass  
591 spectra: a strike against decoy databases. *Journal of Proteome Research*, 7:3354–3363, 2008.
- 592 [6] G. Alves, A. Y. Ogurtsov, and Y. K. Yu. RAId\_aPS: MS/MS analysis with multiple scoring functions  
593 and spectrum-specific statistics. *PLoS ONE*, 5(11):e15438, 2010.
- 594 [7] J. J. Howbert and W. S. Noble. Computing exact p-values for a cross-correlation shotgun proteomics  
595 score function. *Molecular and Cellular Proteomics*, 13(9):2467–2479, 2014.
- 596 [8] U. Keich and W. S. Noble. On the importance of well calibrated scores for identifying shotgun proteomics  
597 spectra. *Journal of Proteome Research*, 14(2):1147–1160, 2015.
- 598 [9] J. K. Eng, T. A. Jahan, and M. R. Hoopmann. Comet: an open source tandem mass spectrometry  
599 sequence database search tool. *Proteomics*, 13(1):22–24, 2012.
- 600 [10] B. Diamant and W. S. Noble. Faster SEQUEST searching for peptide identification from tandem mass  
601 spectra. *Journal of Proteome Research*, 10(9):3871–3879, 2011.
- 602 [11] T. L. Bailey and W. N. Grundy. Classifying proteins by family using the product of correlated  $p$ -values.  
603 In S. Istrail, P. Pevzner, and M. Waterman, editors, *Proceedings of the Third Annual International  
604 Conference on Computational Molecular Biology*, pages 10–14. ACM, April 1999.
- 605 [12] R. Craig and R. C. Beavis. Tandem: matching proteins with tandem mass spectra. *Bioinformatics*,  
606 20:1466–1467, 2004.

- 607 [13] B. N. Pease, E. L. Huttlin, M. P. Jedrychowski, E. Talevich, J. Harmon, T. Dillman, N. Kannan,  
608 C. Doerig, R. Chakrabarti, S. P. Gygi, and D. Chakrabarti. Global analysis of protein expression and  
609 phosphorylation of three stages of *Plasmodium falciparum* intraerythrocytic development. *Journal of*  
610 *Proteome Research*, 12:4028–4045, 2013.
- 611 [14] Damon H. May, Emma Timmins-Schiffman, Molly P. Mikan, H. Rodger Harvey, Elhanan Borenstein,  
612 Brook L. Nunn, and William S. Noble. An alignment-free metapeptide strategy for metaproteomic  
613 characterization of microbiome samples using shotgun metagenomic sequencing. *Journal of Proteome*  
614 *Research*, 15(8):2697–2705, 2016. PMID: 27396978.
- 615 [15] M. Kim, S. M. Pinto, D. Getnet, R. S. Nirujogi, S. S. Manda, R. Chaerkady, A. K. Madugundu, D. S.  
616 Kelkar, R. Isserlin, S. Jain, et al. A draft map of the human proteome. *Nature*, 509(7502):575–581,  
617 2014.
- 618 [16] Hansjrg Götzke, Claudio Muheim, A.F. Maarten Altelaar, Albert J.R. Heck, Gianluca Maddalo, and  
619 Daniel O. Daley. Identification of putative substrates for the periplasmic chaperone yfgm in escherichia  
620 coli using quantitative proteomics. *Molecular & Cellular Proteomics*, 14(1):216–226, 2015.
- 621 [17] C. Y. Park, A. A. Klammer, L. Käll, M. P. MacCoss, and W. S. Noble. Rapid and accurate peptide  
622 identification from tandem mass spectra. *Journal of Proteome Research*, 7(7):3022–3027, 2008.
- 623 [18] S. McIlwain, K. Tamura, A. Kertesz-Farkas, C. E. Grant, B. Diament, B. Frewen, J. J. Howbert, M. R.  
624 Hoopmann, L. Käll, J. K. Eng, M. J. MacCoss, and W. S. Noble. Crux: rapid open source protein  
625 tandem mass spectrometry analysis. *Journal of Proteome Research*, 13(10):4488–4491, 2014.
- 626 [19] S. Kim and P. A. Pevzner. MS-GF+ makes progress toward a universal database search tool for  
627 proteomics. *Nature Communications*, 5:5277, 2014.
- 628 [20] Viktoria Dorfer, Peter Pichler, Thomas Stranzl, Johannes Stadlmann, Thomas Taus, Stephan Winkler,  
629 and Karl Mechtler. MS Amanda, a universal identification algorithm optimized for high accuracy tandem  
630 mass spectra. *Journal of Proteome Research*, 13(8):3679–3684, 2014.
- 631 [21] Lev I. Levitsky, Mark V. Ivanov, Anna A. Lobas, and Mikhail V. Gorshkov. Unbiased false discovery rate  
632 estimation for shotgun proteomics based on the target-decoy approach. *Journal of Proteome Research*,  
633 16(2):393–397, 2017. PMID: 27959540.
- 634 [22] J. E. Elias and S. P. Gygi. Target-decoy search strategy for increased confidence in large-scale protein  
635 identifications by mass spectrometry. *Nature Methods*, 4(3):207–214, 2007.
- 636 [23] W. Bai, J. Bilmes, and W. S. Noble. Bipartite matching generalizations for peptide identification in  
637 tandem mass spectrometry. In *ACM Conference on Bioinformatics, Computational Biology, and Health*  
638 *Informatics*, pages 327–336, Seattle, WA, 2016.
- 639 [24] T. Bailey and M. Gribskov. Estimating and evaluating the statistics of gapped local-alignment scores.  
640 *J Comput Biol*, 9(3):575–593, 2002.
- 641 [25] L. Käll, J. Canterbury, J. Weston, W. S. Noble, and M. J. MacCoss. A semi-supervised machine learning  
642 technique for peptide identification from shotgun proteomics datasets. *Nature Methods*, 4:923–25, 2007.
- 643 [26] A. Keller, A. I. Nesvizhskii, E. Kolker, and R. Aebersold. Empirical statistical model to estimate  
644 the accuracy of peptide identification made by MS/MS and database search. *Analytical Chemistry*,  
645 74:5383–5392, 2002.
- 646 [27] Tamanna Sultana, Rick Jordan, and James Lyons-Weiler. Optimization of the use of consensus methods  
647 for the detection and putative identification of peptides via mass spectrometry using protein standard  
648 mixtures. *Journal of Proteomics and Bioinformatics*, 2(6):262, 2009.
- 649 [28] Marc Vaudel, Julia M Burkhart, René P Zahedi, Eystein Oveland, Frode S Berven, Albert Sickmann,  
650 Lennart Martens, and Harald Barsnes. PeptideShaker enables reanalysis of MS-derived proteomics data  
651 sets. *Nature Biotechnology*, 33(1):22–24, 2015.

- 652 [29] David C Wedge, Ritesh Krishna, Paul Blackhurst, Jennifer A Siepen, Andrew R Jones, and Simon J  
653 Hubbard. FDRAnalysis: a tool for the integrated analysis of tandem mass spectrometry identification  
654 results from multiple search engines. *Journal of Proteome Research*, 10(4):2088–2094, 2011.
- 655 [30] Gelio Alves, Wells W Wu, Guanghui Wang, Rong-Fong Shen, and Yi-Kuo Yu. Enhancing peptide  
656 identification confidence by combining search methods. *Journal of Proteome Research*, 7(8):3102–3113,  
657 2008.
- 658 [31] Brian C Searle, Mark Turner, and Alexey I Nesvizhskii. Improving sensitivity by probabilistically  
659 combining results from multiple MS/MS search methodologies. *The Journal of Proteome Research*,  
660 7(1):245–253, 2008.
- 661 [32] Taejoon Kwon, Hyungwon Choi, Christine Vogel, Alexey I Nesvizhskii, and Edward M Marcotte. MS-  
662 blenders: A probabilistic approach for integrating peptide identifications from multiple database search  
663 engines. *Journal of Proteome Research*, 10(7):2949–2958, 2011.
- 664 [33] Sven Nahnsen, Andreas Bertsch, Jorg Rahnenfuhrer, Alfred Nordheim, and Oliver Kohlbacher. Prob-  
665 abilistic consensus scoring improves tandem mass spectrometry peptide identification. *Journal of Pro-  
666 teome Research*, 10(8):3332–3343, 2011.
- 667 [34] David Shteynberg, Eric W Deutsch, Henry Lam, Jimmy K Eng, Zhi Sun, Natalie Tasman, Luis Mendoza,  
668 Robert L Moritz, Ruedi Aebersold, and Alexey I Nesvizhskii. iProphet: multi-level integrative analysis of  
669 shotgun proteomic data improves peptide and protein identification rates and error estimates. *Molecular  
670 & Cellular Proteomics*, 10(12):M111–007690, 2011.
- 671 [35] Nathan Edwards, Xue Wu, and Chau-Wen Tseng. An unsupervised, model-free, machine-learning  
672 combiner for peptide identifications from tandem mass spectra. *Clinical Proteomics*, 5(1):23, 2009.
